# Supplementary material for: Regulatory mechanisms of lipopolysaccharide synthesis in Escherichia coli
Source: PubMed Central journal article supplement (PMC9356133; doi:10.1038/s41467-022-32277-1), 2022-08-05
Supplement: 41467_2022_32277_MOESM1_ESM.pdf [file 41467_2022_32277_MOESM1_ESM.pdf]

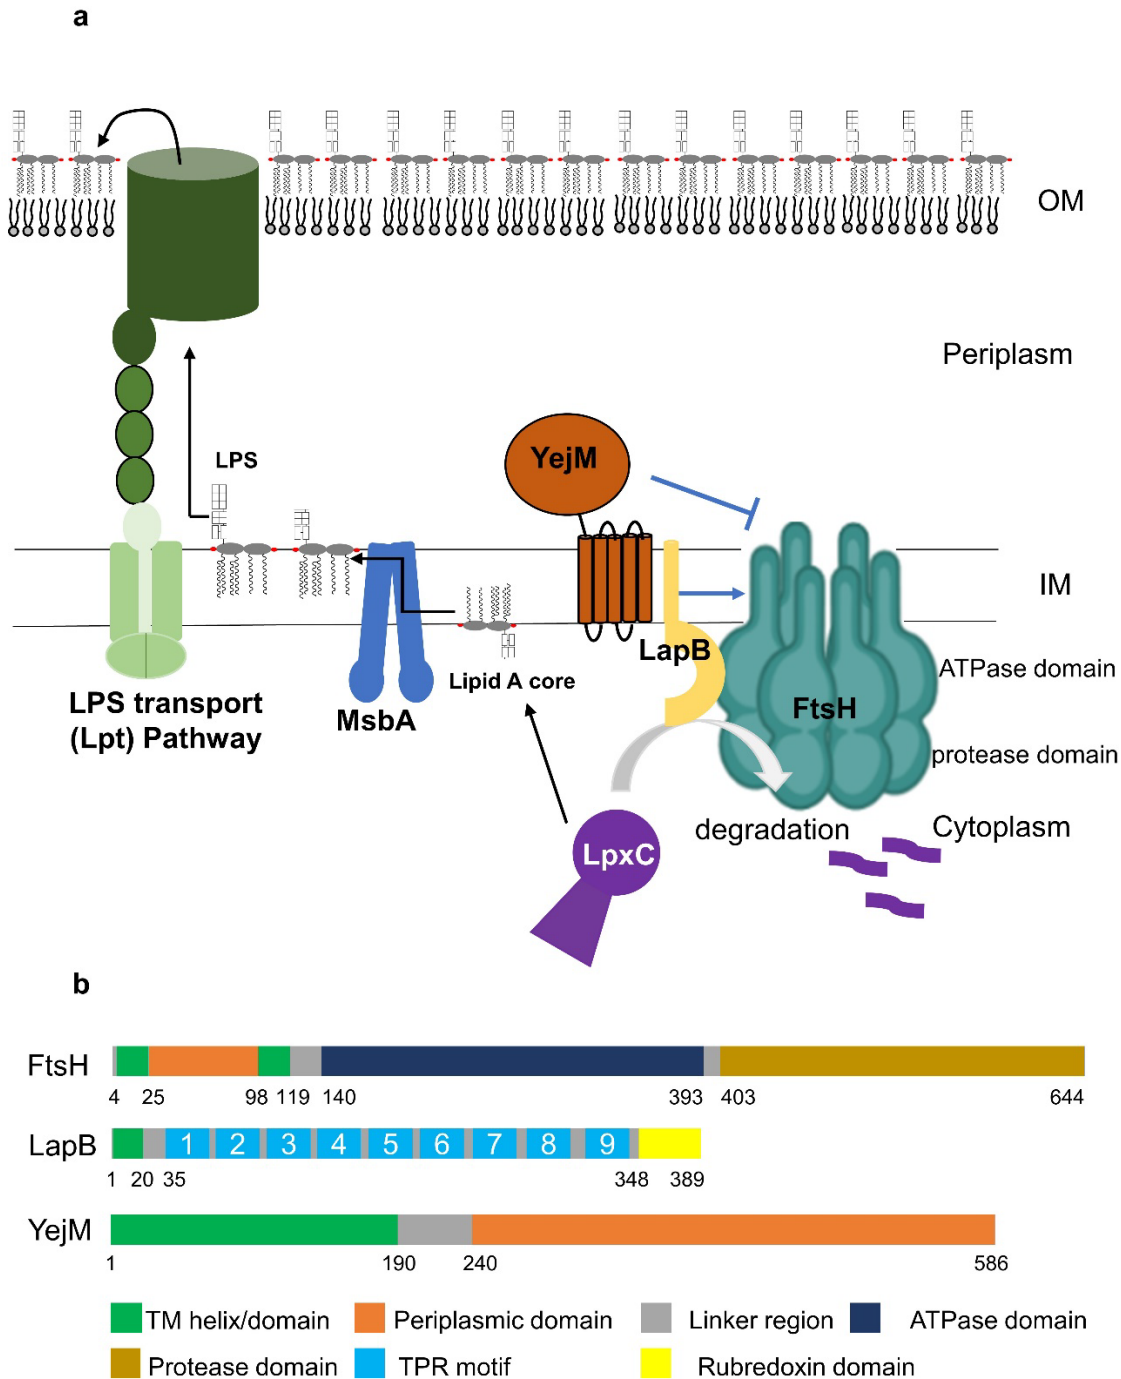

**Supplementary Figure 1 | Synthesis, transport, and regulation of LPS.** **a** Cartoon representation of LPS transport and regulation of its biosynthesis. Black arrows represent the pathway of LPS synthesis and transport; blue arrow represents that LapB stimulates FtsH protease activity on LpxC; blue lines represent YejM inhibits FtsH-mediated LpxC degradation; IM, inner membrane; OM, outer membrane. **b** Schematic representation of domain organization of three essential membrane proteins involved in the regulation of LPS biosynthesis: FtsH, LapB, and YejM.

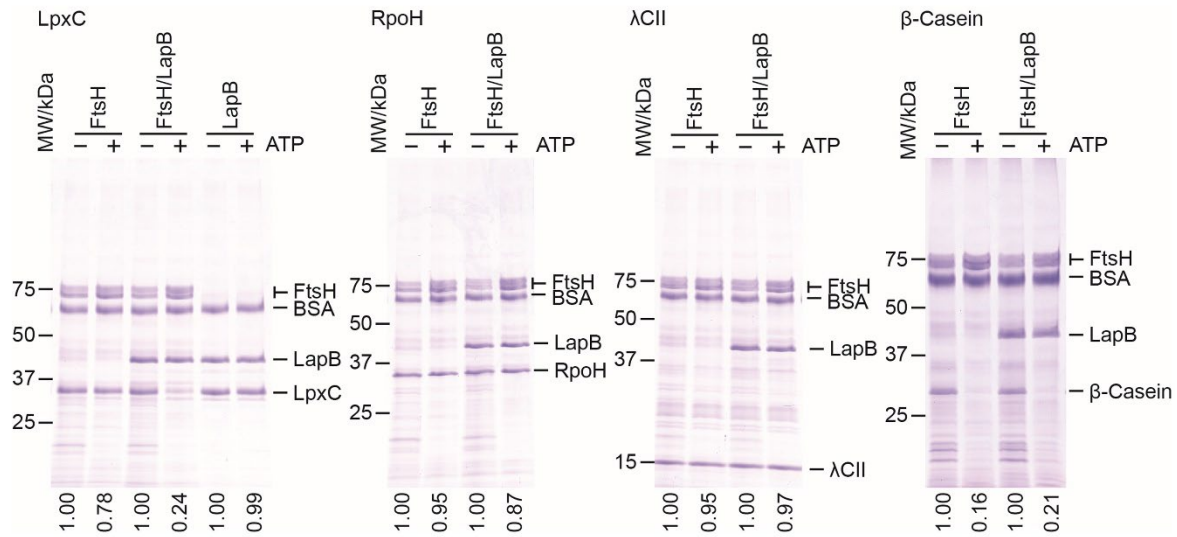

**Supplementary Figure 2 | Degradation of LpxC, RpoH, CII, and  $\beta$ -casein by FtsH or the FtsH/LapB complex in detergent micelles.** For each pair of reactions (without or with ATP), the intensities of the substrate bands are quantified under each lane, with intensities in the reaction without ATP at 1.00. Purified C-terminal His-tagged FtsH showed two bands in SDS-PAGE gels, consistent with a previous report that FtsH undergoes C-terminal self-processing without affecting its protease activity<sup>54</sup>. Each experiment was repeated independently three times with similar results. Source data are provided as a Source Data file.



labeled with fluorescent dye Atto488 (green star), and the digestion rate is estimated by using a plate reader to measure the fluorescence signal from the digestion product of peptide fragment after undigested LpxC is precipitated by trichloroacetic acid (TCA) and separated from the peptide fragments by centrifugation. **b** SDS-PAGE analysis of the degradation of non-labeled LpxC and Atto488-labeled LpxC. The in-gel fluorescence was obtained from the same gel under fluorescence scanner before staining with coomassie brilliant blue (CBB). For each pair of reactions (without or with ATP), the densities of the bands from respective substrates are quantified under each lane, with intensities in the reaction without ATP set to 1.00. **c** Fluorescence signal from the formation of Atto488-labeled peptide segments measured by a plate reader. The initial rates of LpxC degradation under various concentrations are estimated by the increase of fluorescence signal as reactions proceed. Each experiment was repeated three times. **d** Experimental design of inhibition by LapB<sub>cyto</sub> in the assay with FtsH/LapB proteoliposomes. Left, without LapB<sub>cyto</sub> in solution, the reconstituted FtsH/LapB complex degrades LpxC. Right, LapB<sub>cyto</sub> in the solution binds to the substrate LpxC, and prevents LpxC from being recruited to the FtsH/LapB proteoliposomes for degradation. Source data for **c** are provided as a Source Data file.

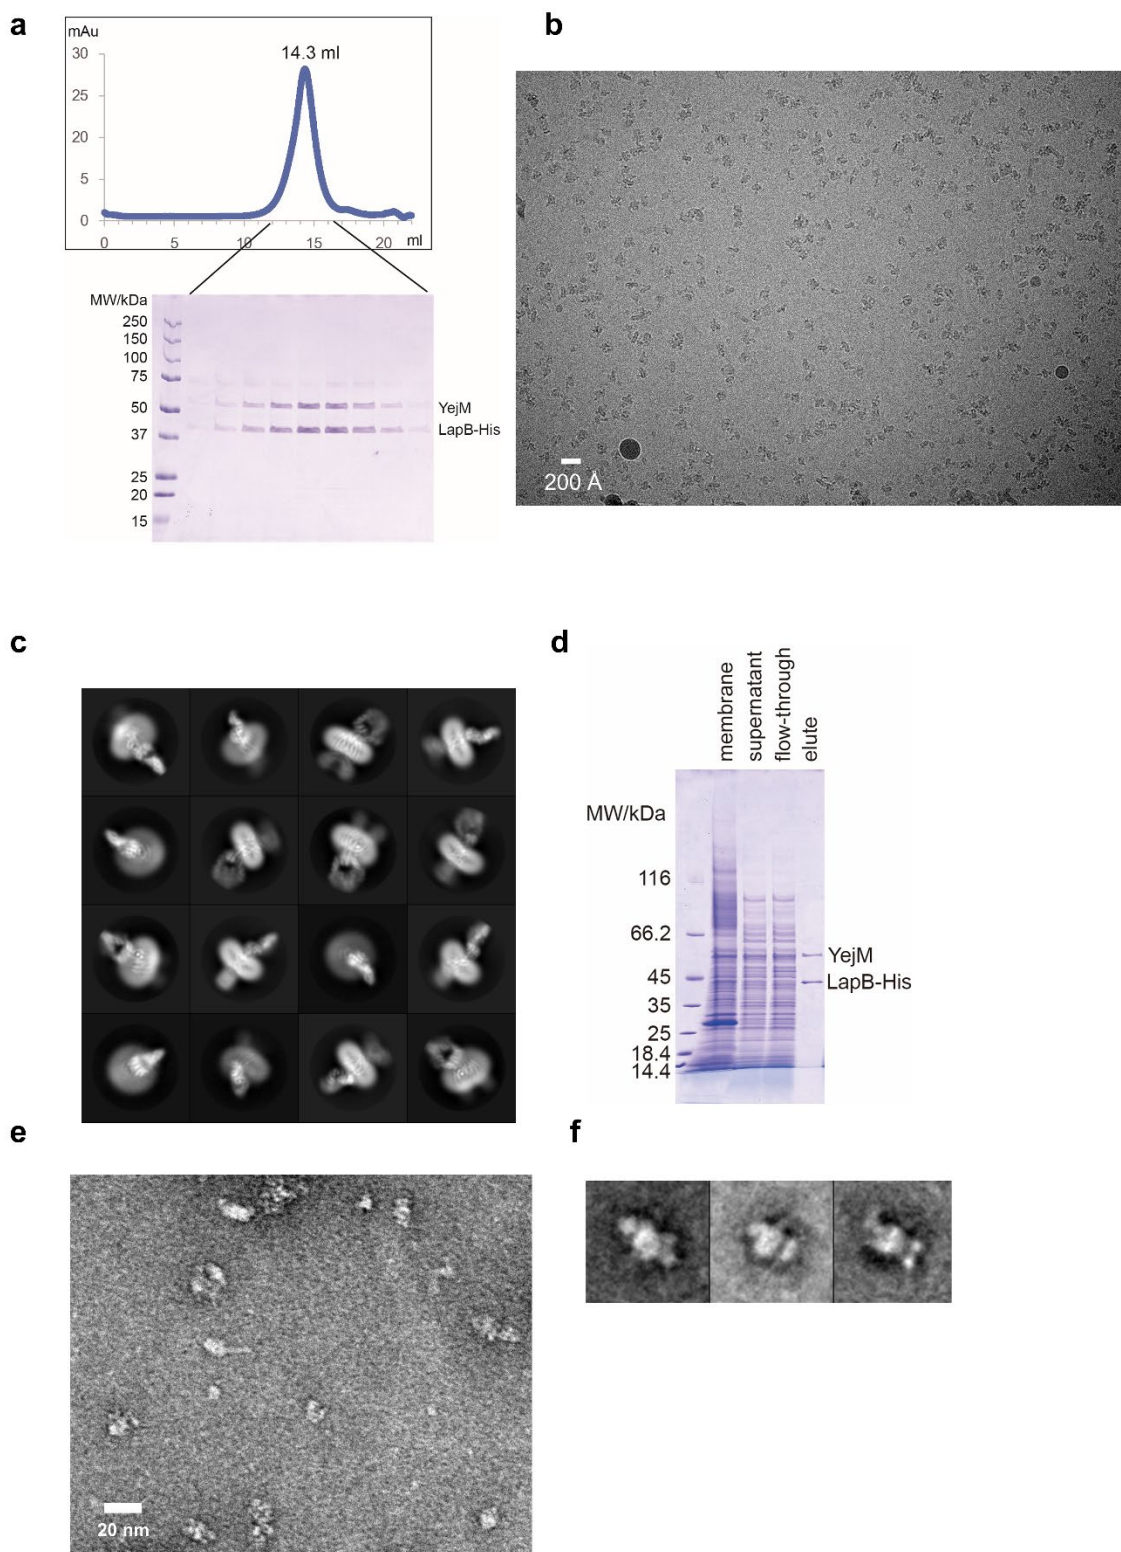

**Supplementary Figure 4 | Purification of the YejM/LapB complex, EM images, and two-dimensional (2D) classification averages. a** Size exclusion chromatography of the YejM/LapB

complex in detergent GDN and SDS-PAGE analysis of fractions across the peak. Each experiment was repeated independently three times with similar results. **b** A representative of cryoEM image of the purified YejM/LapB complex in GDN after motion correction from 26362 images. **c** Selected class averages from 2D classification of particles from cryoEM images. **d** SDS-PAGE analysis of YejM/LapB complex purified with SMA. Each experiment was repeated independently three times with similar results. **e** A representative of negative stain EM image of the YejM/LapB complex in SMA from more than 40 images. **f** Selected 2D class averages particles of negative stain YejM/LapB complex in SMA.

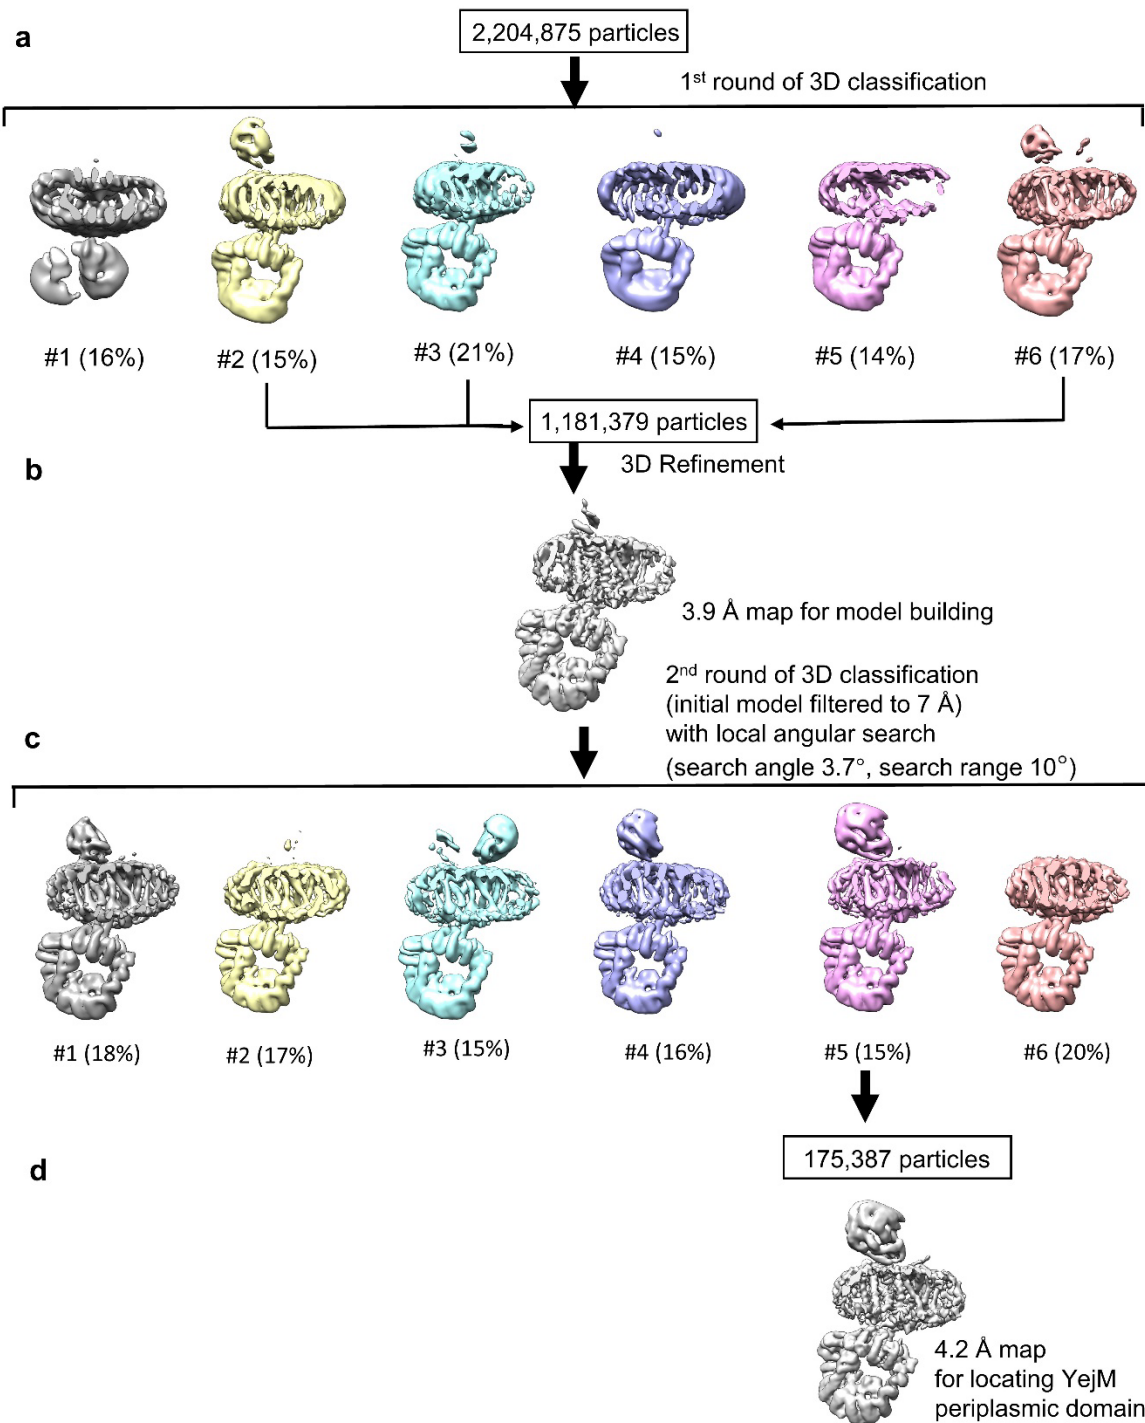

**Supplementary Figure 5 | Image processing workflow for the YejM/LapB complex structure determination.** **a** Initial 3D classification with RELION default parameters to remove bad particles. **b** 3D reconstruction of particles from the selected classes in the initial 3D classification with CryoSPARC non-uniform refinement. **c** A second round of 3D classification with local angular search by RELION. **d** 3D reconstruction of selected particles from class #5 in the second-round classification with CryoSPARC non-uniform refinement.

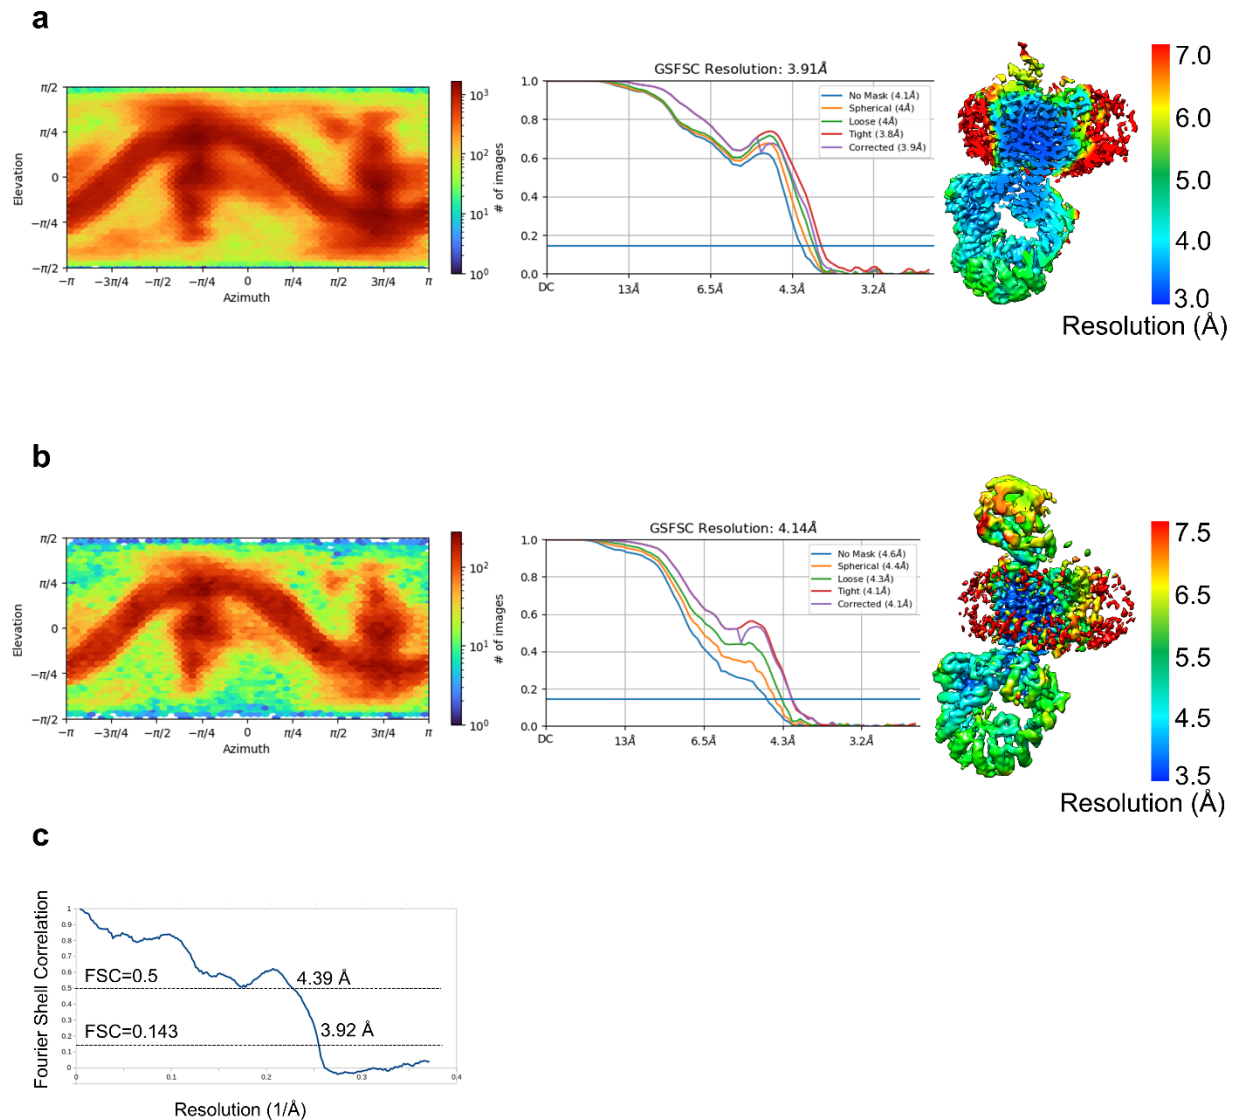



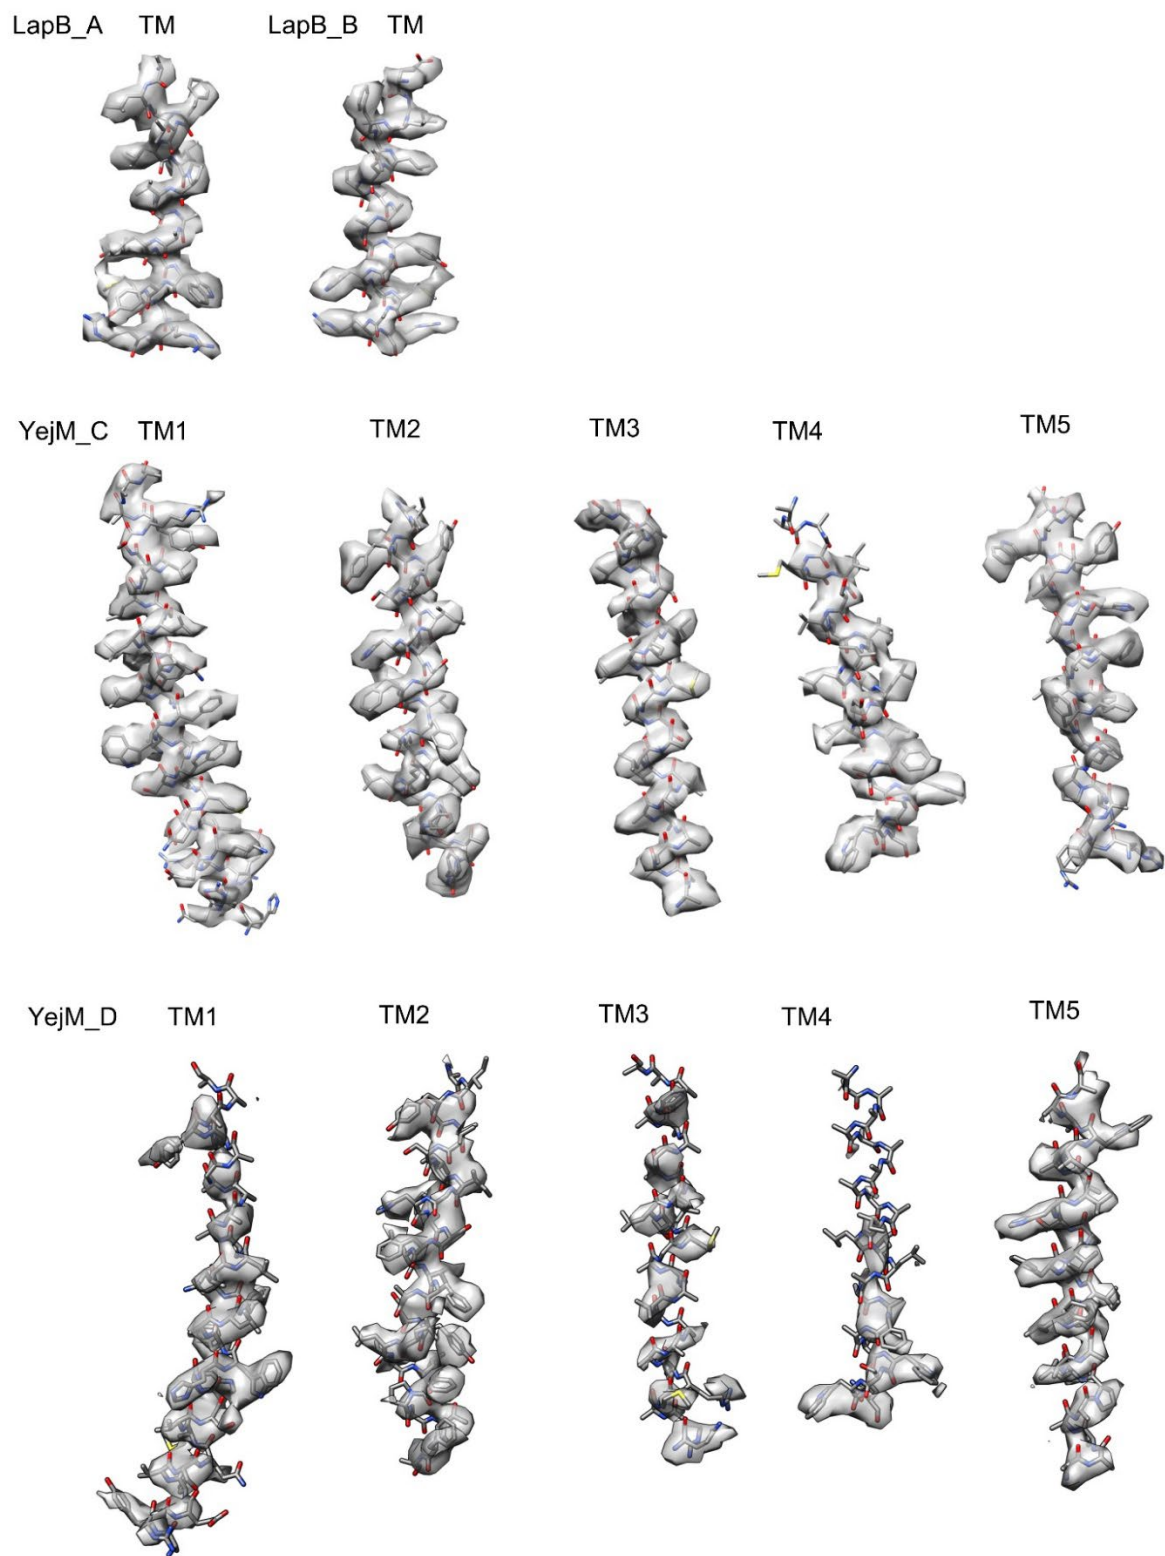

**Supplementary Figure 7 | Densities and model of the TM domains in the YejM/LapB complex.**

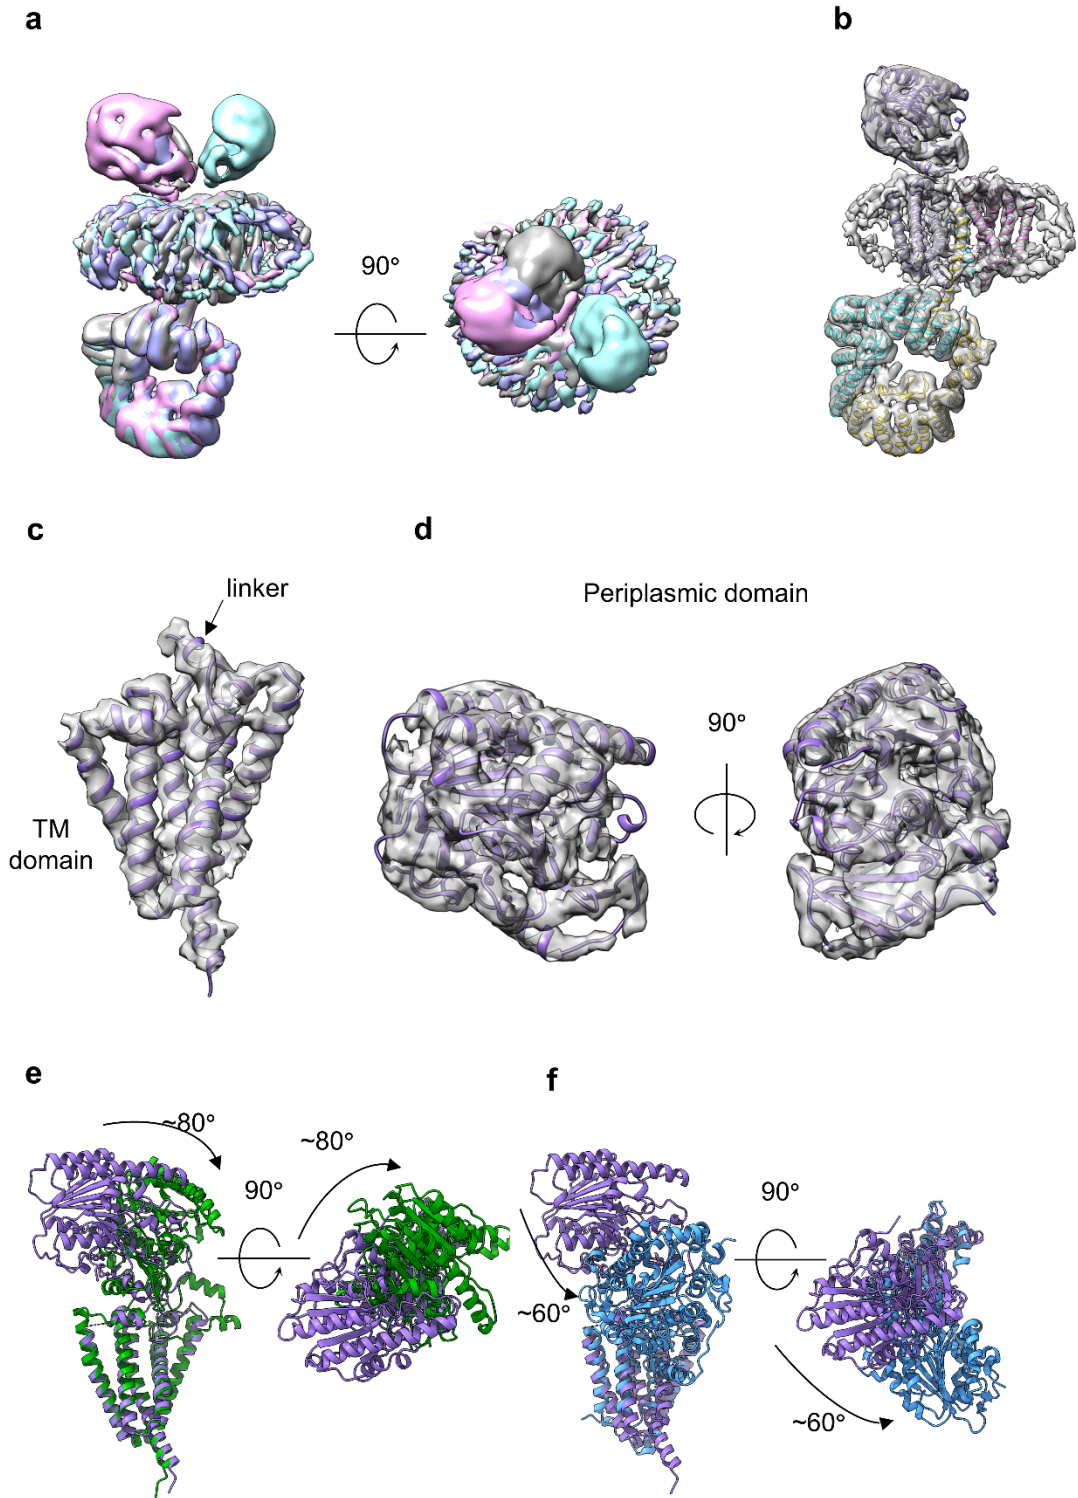

**Supplementary Figure 8 | Flexibility of YejM periplasmic domain.** **a** Superimposing maps of classes #1, #3, #4 and #5 from the second round of classification in Supplementary Fig. 4. **b** The

4.1 Å map with the fitted model. **c** The TM and linker regions of the 4.1 Å map with the fitted atomic model. **d** The periplasmic regions of the 4.1 Å map with a docked crystal structure of YejM periplasmic domain. **e** Structural comparison of YejM\_C (purple) in the YejM/LapB complex with YejM in the YejM/LPS crystal structure (green) by superimposing their TM domains. **f** Structural comparison of YejM\_C (purple) in the YejM/LapB complex with EptA (cyan) by superimposing their TM domains.

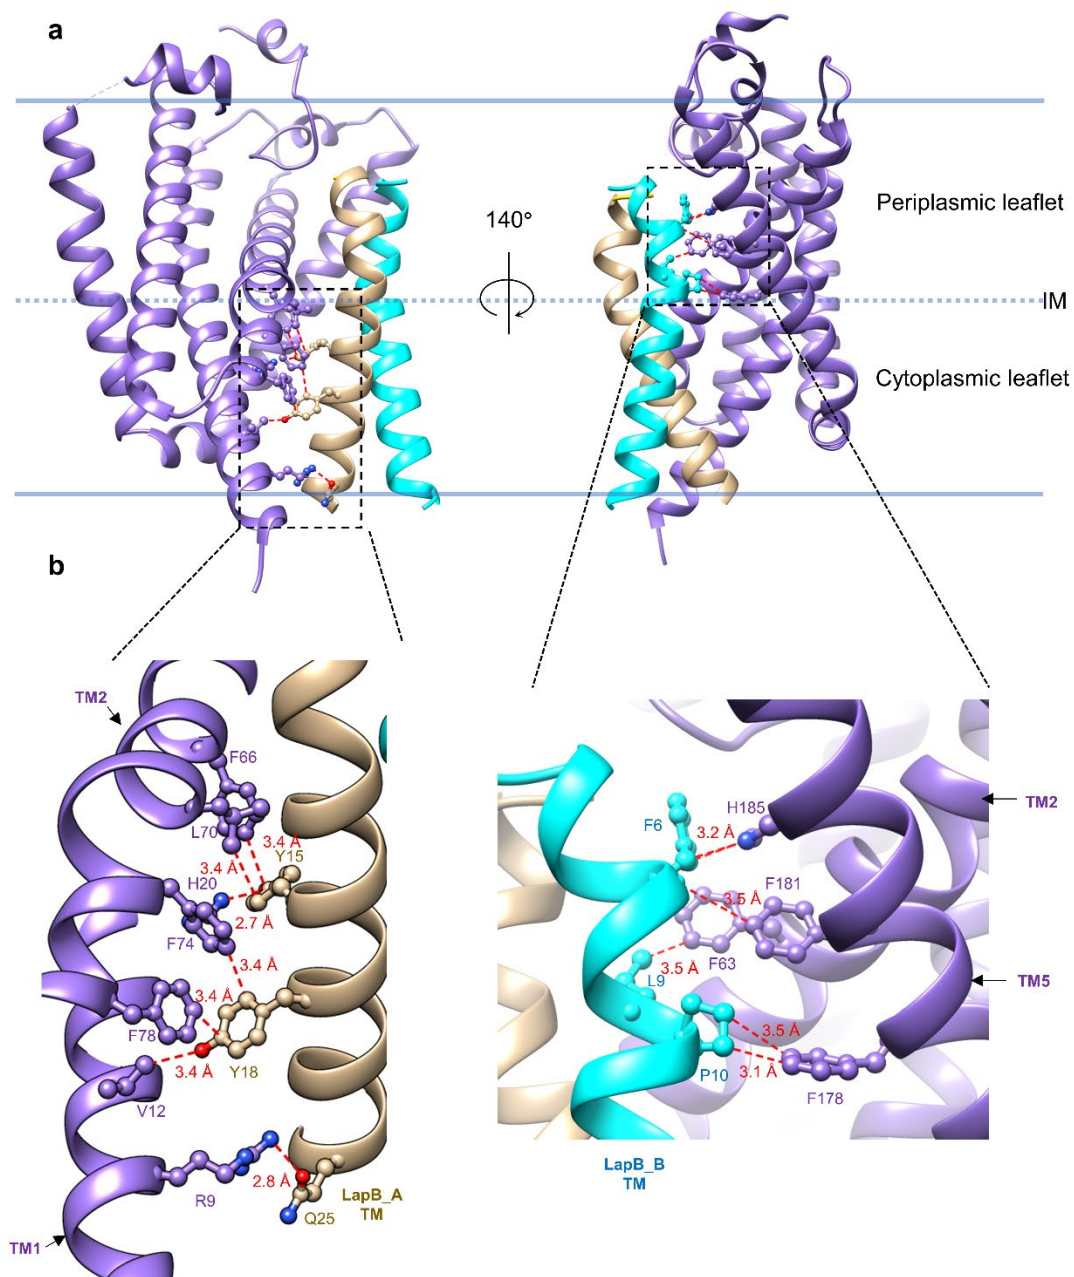

**Supplementary Figure 9 | Interactions between YejM\_C and LapB dimer.** **a** Interactions between the YejM\_C and each LapB molecule are located in the different leaflets of the IM. The thick blue lines indicate the boundaries of the inner membrane (IM) and the dashed line indicates the interface of two leaflets. Dashed rectangles highlight protein/protein interactions in each leaflet, with residues involved in interactions presented as sticks and balls. **b** Zoomed-in view of protein/protein interactions between YejM\_C and the LapB dimer. Regions in the dashed rectangles are enlarged to show details of protein/protein interactions. Residues involved in interactions are labeled and shown as balls and sticks, and the interactions (within 3.5 Å) are highlighted by dashed red lines with distances labeled.

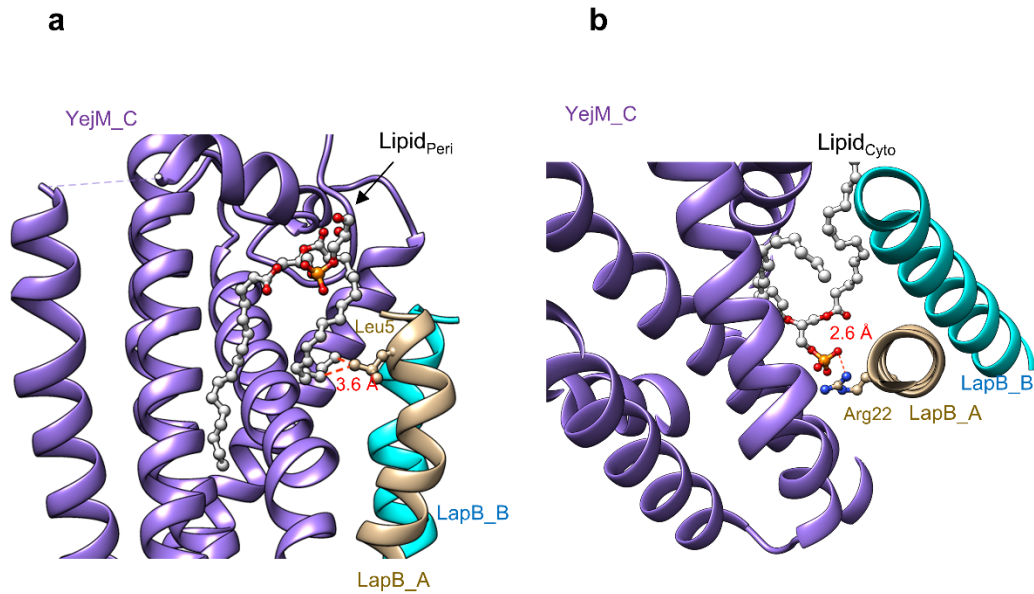

**Supplementary Figure 10 | Interactions between the lipid molecules and LapB.** Both lipids and the interacting residues are shown as ball and stick, and the interactions are highlighted by dashed red lines with distances labeled.

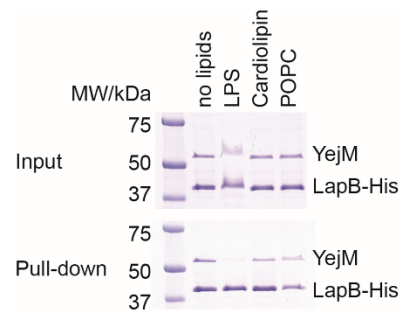

**Supplementary Figure 11 | LPS disrupts the interactions between YejM and LapB.** SDS-PAGE analysis of YejM/LapB<sub>His</sub>, after incubating without or with lipids for 30 min (Input) and elution from TALON metal affinity resin after extensive washing (Pull-down). Each experiment was repeated independently three times with similar results. Source data are provided as a Source Data file.

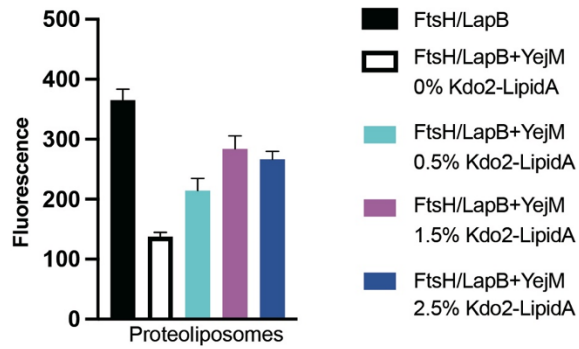

**Supplementary Figure 12** | Dose-dependent effect of Kdo2-Lipid A on LpxC degradation by FtsH/LapB/YejM proteoliposomes. Each experiment was repeated three times and all data were presented as mean values with error bars representing standard deviations (SDs) of triplicates. Source data are provided as a Source Data file.

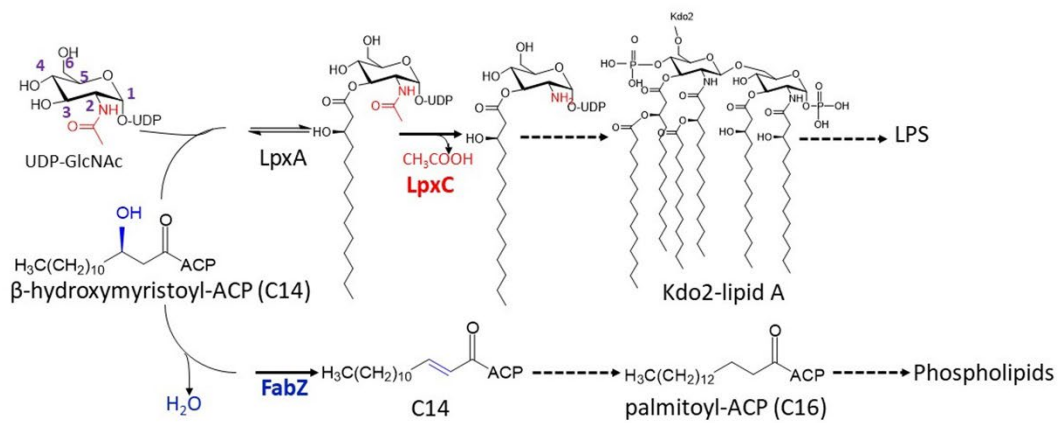

**Supplementary Figure 13 | Coupling of LPS and phospholipid synthesis.** Two pathways share a common precursor,  $\beta$ -hydroxymyristoyl-ACP. Two key enzymes, LpxC and FabZ, are highlighted in two pathways. Multiple steps are skipped as dashed arrows for clarity.



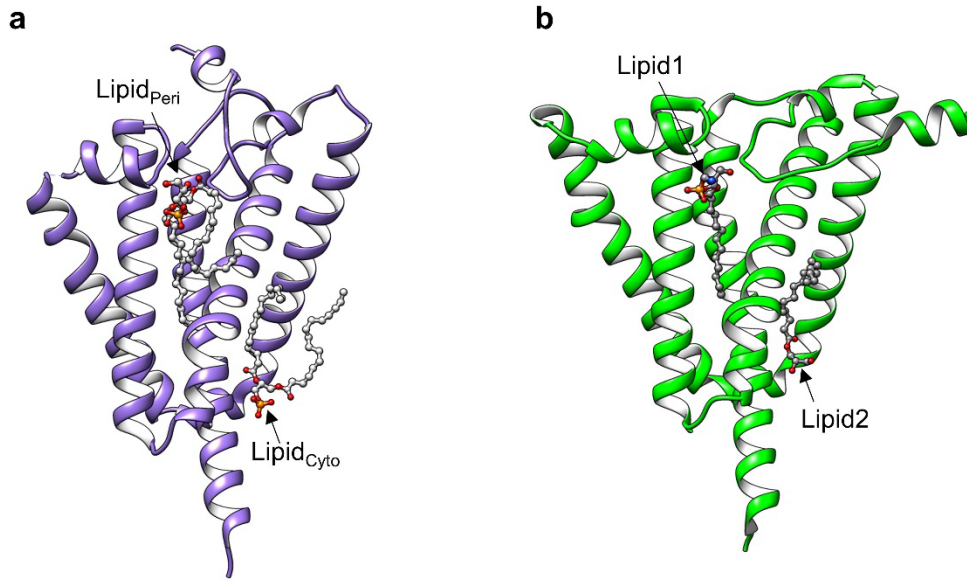

**Supplementary Figure 14 | Phospholipid molecules in the YejM\_C of the LapB/YejM complex and the crystal structure of YejM.**

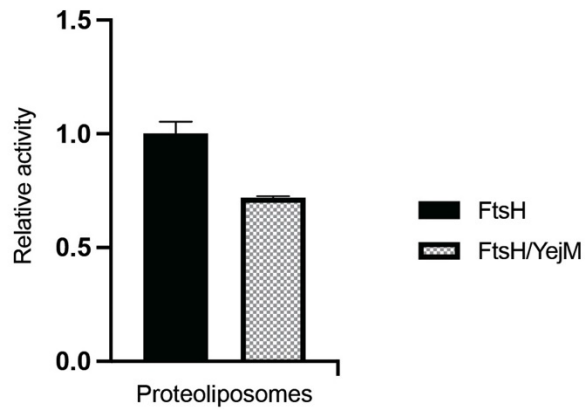

**Supplementary Figure 15 | Protease activity on LpxC of proteoliposomes with FtsH and FtsH/YejM.** The activity of FtsH-proteoliposomes is set to 1, and the activity of FtsH/YejM proteoliposomes is normalized to it. Each experiment was repeated three times and all data were presented as mean values with error bars representing standard deviations (SDs) of triplicates. Source data are provided as a Source Data file.

| name             | sequence                                                       | note                                |
|------------------|----------------------------------------------------------------|-------------------------------------|
| NdeI-FtsH-F      | AGAAGGAGATATACAtatggcgaaaacctaataactctgg                       | For pETduet-FtsH-3C-10His           |
| FtsH-R           | ACCCTGTGTTTGAGCCTCCTTGTCGCCTAACTGTTCTGAC                       | For pETduet-FtsH-3C-10His           |
| FtsH-stop-F      | CAGTTAGGCGACAAGtaaGAGGCTCAAACACAGGGT                           | Quick change to add stop code       |
| FtsH-stop-R      | CTGTGTTTGAGCCTCttaCTTGTCGCCTAACTGTTC                           | Quick change to add stop code       |
| YciM-XhoI-R      | GTGGTGGTGGTGGTGCtcCAGGCCATCAAGACCGC                            | For pRSF22b-LapB-6His               |
| NdeI-YciM-F      | AAGAAGGAGATATACATATGCTGGAGTTGTTGTTTCTG                         | For pRSF22b-LapB-6His               |
| RSF-DjlA-F       | AAGAAGGAGATATACATATGCAGTATTGGGAAAAAATCAT<br>TG                 | For pRSF22b-DjlA-TM-LapB-21-389-His |
| DjlA-TM-YciM21-R | TTGTTGCGCACTTCTGCGATGGCCAATTAACAGGCCTAAC                       | For pRSF22b-DjlA-TM-LapB-21-389-His |
| RSF-AcrZ-F       | AAGGAGATATACATatgATGTTAGAGTTATTA AAAAAGTCTG<br>GTATTCG         | For pRSF22b-AcrZ-TM-LapB-21-389-His |
| AcrZ-TM-YciM-R   | TTGTTGCGCACTTCTGCGACCGTAAATCAGACCCAGG                          | For pRSF22b-AcrZ-TM-LapB-21-389-His |
| RSF-KdtA-F       | AAGAAGGAGATATACATATGCTCGAATTGCTTTACACC                         | For pRSF22b-KdtA-TM-LapB-21-389-His |
| KdtA-TM-YciM21-R | TTGTTGCGCACTTCTGCGACCCAGAGCCGTATCCAG                           | For pRSF22b-KdtA-TM-LapB-21-389-His |
| YciM-21-F        | CGCAGAAGTGCGCAACAA                                             | Amplify LapB 21-389                 |
| pET-LpxC-F       | CACAGGGTCCTGGCGCcATGATCAAACAAAGGACACTTAA<br>ACG                | For pETduet-N-10His-3C-LpxC         |
| LpxC-AflII-R     | ttactttctgttcgacTTATGCCAGTACAGCTGAAGGC                         | For pETduet-N-10His-3C-LpxC         |
| pET-RpoHF        | AAGAAGGAGATATACAtATGACTGACAAAATGCAAAGTTT<br>AGC                | For pETduet-RpoH-3C-10His           |
| RpoH-3C-R        | ACCCTGTGTTTGAGCCTCCTCGAGCGCTTCAATGGC                           | For pETduet-RpoH-3C-10His           |
| pET-CII-F        | CACAGGGTCCTGGCGCcATGGTTCGTGCAAACAAACG                          | For pETduet-N-10His-3C-λCII         |
| pET-CII-R        | TTACTTTCTGTTTCGACTTAGAATCCATCTGGATTTGTTCA<br>G                 | For pETduet-N-10His-3C-λCII         |
| NdeI-YciM21-F    | AAGAAGGAGATATACATCGCAGAAGTGCGCAACA                             | For pRSF22B-LapBcyto-6His           |
| NdeI-YejM-F      | aagaaggagatatacatATGGTAACTCATCGTCAGCG                          | For pCDFduet-YejM-6His              |
| YejM-His-XhoI-R  | ggtttctttaccagactcagtgatggtggtgatggtgGTTAGCGATAAAACGCTT<br>CTC | For pCDFduet-YejM-6His              |

**Supplementary Table 1 | primers used in this study.**

| Protein or protein complex                         | Tag        | Vector   | Expression strain                   | Antibiotics        | Medium | Expression temp./time | Detergent | Purification steps                                                       |
|----------------------------------------------------|------------|----------|-------------------------------------|--------------------|--------|-----------------------|-----------|--------------------------------------------------------------------------|
| FtsH                                               | C-3C-10His | pETduet  | BL21 Star <sup>TM</sup> (DE3) pLysS | Amp<br>Cam         | TB     | 30°C, 4 hours         | LMNG      | Cobalt affinity purification                                             |
| LapB <sub>His</sub>                                | C-6His     | pRSF22   | BL21 Star <sup>TM</sup> (DE3) pLysS | Kan<br>Cam         | TB     | 30°C, 4 hours         | GDN       |                                                                          |
| FtsH <sub>His</sub> /LapB <sub>His</sub>           | C-3C-10His | pETduet  | BL21 Star <sup>TM</sup> (DE3) pLysS | Amp<br>Kan<br>Cam  | TB     | 30°C, 4 hours         | LMNG      |                                                                          |
|                                                    | C-6His     | pRSF22b  |                                     |                    |        |                       |           |                                                                          |
| FtsH/LapB <sub>His</sub>                           | –          | pETduet  | BL21 Star <sup>TM</sup> (DE3) pLysS | Amp<br>Kan<br>Cam  | TB     | 30°C, 4 hours         | LMNG      |                                                                          |
|                                                    | C-6His     | pRSF22b  |                                     |                    |        |                       |           |                                                                          |
| FtsH/AcrZ <sub>TM</sub> -LapB <sub>cyto</sub> -His | –          | pETduet  | BL21 Star <sup>TM</sup> (DE3) pLysS | Amp<br>Kan<br>Cam  | TB     | 30°C, 4 hours         | LMNG      |                                                                          |
|                                                    | C-6His     | pRSF22b  |                                     |                    |        |                       |           |                                                                          |
| FtsH/DjlA <sub>TM</sub> -LapB <sub>cyto</sub> -His | –          | pETduet  | BL21 Star <sup>TM</sup> (DE3) pLysS | Amp<br>Kan<br>Cam  | TB     | 30°C, 4 hours         | LMNG      |                                                                          |
|                                                    | C-6His     | pRSF22b  |                                     |                    |        |                       |           |                                                                          |
| FtsH/KdtA <sub>TM</sub> -LapB <sub>cyto</sub> -His | –          | pETduet  | BL21 Star <sup>TM</sup> (DE3) pLysS | Amp<br>Kan<br>Cam  | TB     | 30°C, 4 hours         | LMNG      |                                                                          |
|                                                    | C-6His     | pRSF22b  |                                     |                    |        |                       |           |                                                                          |
| LpxC                                               | N-10His-3C | pETduet  | BL21 Star <sup>TM</sup> (DE3) pLysS | Amp<br>Cam         | LB     | 30°C, 4 hours         | –         | Nickel affinity purification→3C cleavage→Flow through Ni-NTA-agarose→SEC |
| RpoH                                               | C-10His-3C | pETduet  | BL21 Star <sup>TM</sup> (DE3)       | Amp                | LB     | 18°C, overnight       | –         |                                                                          |
| λCII <sub>His</sub>                                | N-10His-3C | pETduet  | BL21 Gold (DE3)                     | Amp                | LB     | 37°C, 3 hours         | –         | Nickel affinity purification→SEC                                         |
| LapB <sub>cyto</sub> -His                          | C-6His     | pRSF22b  | BL21 Star <sup>TM</sup> (DE3) pLysS | Kan<br>Cam         | LB     | 30°C, 4 hours         | –         | C                                                                        |
| YejM/LapB <sub>His</sub>                           | –          | pCDFduet | BL21 Star <sup>TM</sup> (DE3) pLysS | Spec<br>Kan<br>Cam | TB     | 30°C, 4 hours         | GDN       | Cobalt affinity purification→SEC                                         |
|                                                    | C-6His     | pRSF22b  |                                     |                    |        |                       |           |                                                                          |
| YejM <sub>His</sub>                                | C-6His     | pCDFduet | BL21 Gold (DE3)                     | Spec               | TB     | 18°C, overnight       | DDM       | Cobalt affinity purification                                             |

**Supplementary Table 2 | constructs, expression conditions, and purification of the proteins/protein complexes**

| <b>Cryo-EM data collection and processing</b>   | YejM/LapB without periplasmic domains | YejM/LapB with a periplasmic domain |
|-------------------------------------------------|---------------------------------------|-------------------------------------|
| Voltage (kV)                                    | 300                                   |                                     |
| Electron dose (e <sup>-</sup> /Å <sup>2</sup> ) | 50                                    |                                     |
| Number of collected movies                      | 23,363                                |                                     |
| Particle defocus range (μm)                     | 1.0-2.5                               |                                     |
| Number of particles for 3D classification       | 2,204,875                             | 1,181,379                           |
| Number of particles for final map               | 1,181,379                             | 175,387                             |
| Resolution (Å)                                  | 3.9                                   | 4.1                                 |
| Map sharpening B-factor (Å <sup>2</sup> )       | -216                                  | -167                                |
| <b>Atomic model refinement</b>                  |                                       |                                     |
| Number of protein residues                      | 1181                                  |                                     |
| Number of side chains                           | 423                                   |                                     |
| Number of lipids                                | 2                                     |                                     |
| Number of atoms                                 | 7566                                  |                                     |
| <b>Geometric parameters (RMSZ)</b>              |                                       |                                     |
| Bond length (Å)                                 | 0.32                                  |                                     |
| Bond angle (°)                                  | 0.50                                  |                                     |
| <b>Ramachandran statistics</b>                  |                                       |                                     |
| Residues in favoured regions (%)                | 97.00                                 |                                     |
| Residues in allowed regions (%)                 | 2.91                                  |                                     |
| Residues in disallowed regions (%)              | 0.09                                  |                                     |
| Rotamer outliers (%)                            | 1.42                                  |                                     |
| MolProbity score                                | 1.89                                  |                                     |
| Clash score                                     | 12.18                                 |                                     |

**Supplementary Table 3 | Statistics of the cryo-EM structures presented in this study.**

## REFERENCES:

- 54 Akiyama, Y. Self-processing of FtsH and its implication for the cleavage specificity of this protease. *Biochemistry* **38**, 11693-11699, doi:10.1021/bi991177c (1999).
